# Supplementary material
Source: publisher figshare collection journal article supplement (https://acs.figshare.com/ndownloader/files/11795957)
Supplement: Supplementary file 1 [file 11795957]

# Effects of regular networks composed of rigid and flexible segments on the shape memory performance of epoxies

*Xiaocun Tan<sup>†</sup>, Qi Zou<sup>†</sup>, Yizhou Huang<sup>†</sup>, Mengyu Ouyang<sup>†</sup>, Yazhou Tian<sup>†</sup>, Jue Cheng<sup>†,\*</sup>, Junying*

*Zhang<sup>†,\*</sup>*

<sup>†</sup>Beijing Advanced Innovation Center for Soft Matter Science and Engineering, Beijing University of

Chemical Technology, Beijing 100029, People's Republic of China

\*Corresponding author. Tel.: +86 10 64425439; fax: +86 10 64425439

E-mail address: chengjue@mail.buct.edu.cn (J. Cheng), zhangjy@mail.buct.edu.cn (J.Zhang)

The supporting information has following contents,

The detailed formulations (mass ratio) for the curing reaction were shown in **Table S1**.

**Table S1.** Formulations (mass ratio) of DTAGEs/DDM and M-AGE/DDM samples

| Sample      | EDT-AGE (g) | HDT-AGE (g) | DDT-AGE (g) | DDM (g) |
|-------------|-------------|-------------|-------------|---------|
| EDT-AGE/DDM | 100         | -           | -           | 30.4    |
| HDT-AGE/DDM | -           | 100         | -           | 25.7    |
| DDT-AGE/DDM | -           | -           | 100         | 22.1    |
| M-AGE /DDM  | 33.3        | 33.4        | 33.3        | 26.1    |

The DMA spectra of DTAGE/DDM and M-AGE/DDM samples were shown in Figure S1.

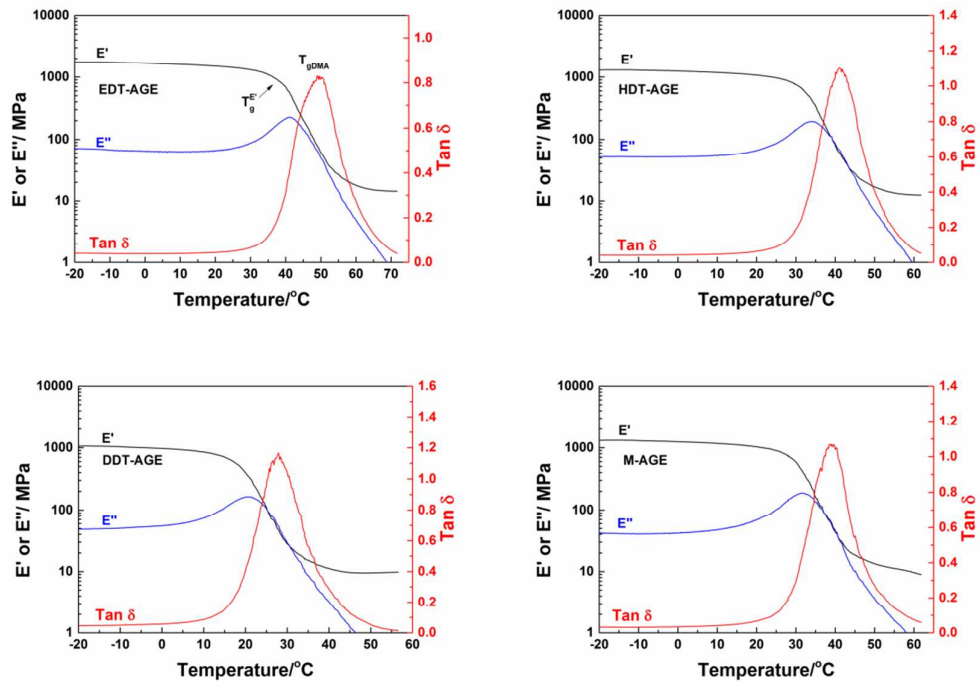

**Figure S1.** DMA spectra of DTAGE/DDM and M-AGE/DDM samples

The 3D strain-stress-temperature diagrams for DTAGEs/DDM and M-AGE/DDM networks were shown in Figure S2.

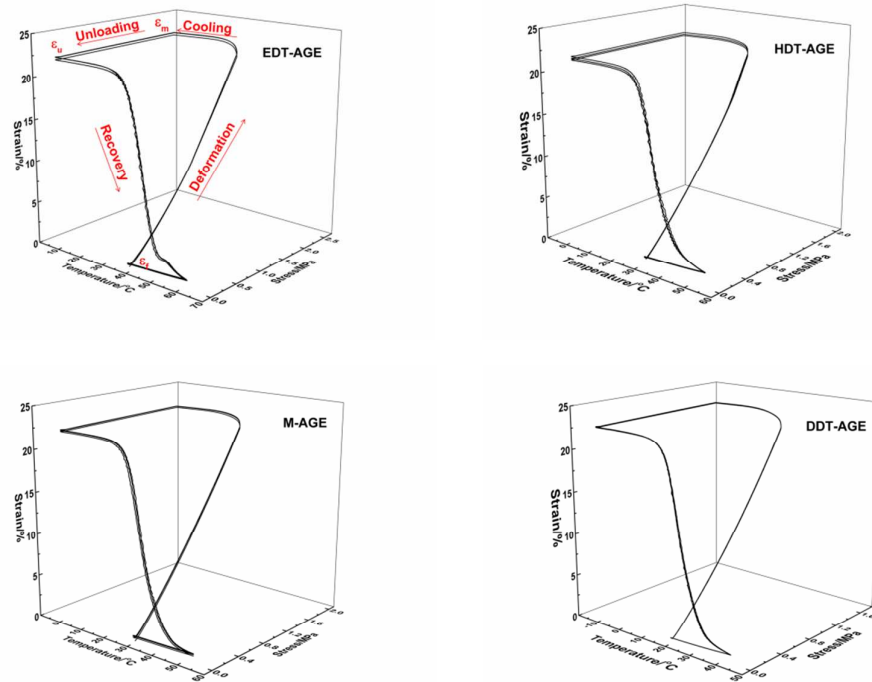

**Figure S2.** 3D strain-stress-temperature diagrams for DTAGEs/DDM and M-AGE/DDM networks
